# Supplementary material for: Excellent Cr(vi) adsorbent made from pyrolyzed green coconut trash with parametric modelling and optimization using RSM and experimental data
Source: Royal Society of Chemistry journal article supplement (doi:10.1039/d3nj00224a), 2023-01-01
Supplement: d3nj00224a1.pdf [file d3nj00224a1.pdf]

## Supporting Materials

### Excellent Cr(VI) adsorbent made from pyrolyzed green coconut trash with parametric modelling and optimization using RSM and experimental data

Supplementary Tables

**Table S1** - Nonlinear models of kinetics and adsorption isotherms.

| <b>Kinetic Models</b>          | <b>Equations</b>                                                         |
|--------------------------------|--------------------------------------------------------------------------|
| <b>Pseudo-first order</b>      | $q_t = q_e [1 - \exp^{-k_1 t}]$                                          |
| <b>Pseudo-second order</b>     | $q_t = \frac{q_e^2 k_2 t}{1 + q_e k_2 t}$                                |
| <b>Intraparticle diffusion</b> | $q_t = k_{int} t^{0.5} + \beta$                                          |
| <b>Isotherm Models</b>         | <b>Equations</b>                                                         |
| <b>Langmuir</b>                | $q_e = \frac{q_m K_L C_e}{1 + K_L C_e}$<br>$R_L = \frac{1}{1 + K_L C_0}$ |
| <b>Freundlich</b>              | $q_e = K_F C_e^{\frac{1}{n_f}}$                                          |
| <b>Temkin</b>                  | $q_e = \frac{RT}{b_t} \ln(a_t C_e)$                                      |
| <b>Toth</b>                    | $q_e = \frac{q_m K_t C_e}{(1 + (K_t C_e)^t)^{\frac{1}{t}}}$              |

$q_t$  (mg g<sup>-1</sup>) gives adsorption capacity of Cr(VI) at any time  $t$  (min);  $q_e$  (mg g<sup>-1</sup>) gives theoretical adsorption capacity in equilibrium which was calculated using the kinetic models;  $k_1$  (min<sup>-1</sup>),  $k_2$  (g mg<sup>-1</sup> min<sup>-1</sup>), and  $k_{int}$  (mg g<sup>-1</sup> min<sup>-0.5</sup>) are adsorption rate constants for given kinetic models;  $\beta$  constant relates to the thickness of the boundary layer.

In the above equations  $C_e$  (mg/L) equilibrium Cr(VI) concentration,  $C_0$  (mg/L) gives initial Cr(VI) concentration,  $q_e$  (mg/g) gives adsorption capacity for equilibrium,  $q_m$  (mg/g) gives maximum monolayer adsorption capacity,  $K_L$  (L/mg) gives Langmuir constant,  $K_F$  (mg/g). (mg/L)<sup>-1/n<sub>f</sub></sup> as Freundlich isotherm equilibrium constant related to Cr(VI) adsorption capacity, and  $n_f$  depicts factor heterogeneity,  $R_L$  is separation factor,  $b_t$  (J/mol) denotes Temkin constant,  $a_t$  (L/mg) gives Temkin isotherm constant, and  $R$  was used as universal gas constant (8.314 J/mol.K), also  $T$  (K) gives temperature,  $K_t$  (L/mg) Toth constant related to binding affinity which is specific to the adsorbate and adsorbent pair and  $t$  is surface heterogeneity parameter.

**Table S2** BBD matrix of three factors and the results.

| <b>Run count</b> | <b>pH</b> | <b>The temperature in (°C)</b> | <b>Dosage (g/L)</b> | <b>Actual, Removal %</b> | <b>Predicted, Removal %</b> |
|------------------|-----------|--------------------------------|---------------------|--------------------------|-----------------------------|
| 1                | 4         | 40                             | 6.5                 | 46.31                    | 47.41                       |
| 2                | 4         | 35                             | 5                   | 66.98                    | 65.55                       |
| 3                | 3.25      | 30                             | 8                   | 92.87                    | 92.54                       |
| 4                | 3.25      | 35                             | 6.5                 | 73.63                    | 73.59                       |
| 5                | 2.5       | 35                             | 8                   | 80.21                    | 81.64                       |
| 6                | 3.25      | 35                             | 6.5                 | 73.54                    | 73.59                       |
| 7                | 2.5       | 30                             | 6.5                 | 99.99                    | 98.89                       |
| 8                | 4         | 35                             | 8                   | 72.65                    | 71.47                       |
| 9                | 3.25      | 35                             | 6.5                 | 73.62                    | 73.59                       |
| 10               | 3.25      | 40                             | 5                   | 44.98                    | 45.31                       |
| 11               | 2.5       | 35                             | 5                   | 74.52                    | 75.70                       |
| 12               | 4         | 30                             | 6.5                 | 78.36                    | 79.87                       |
| 13               | 3.25      | 35                             | 6.5                 | 73.46                    | 73.59                       |
| 14               | 3.25      | 40                             | 8                   | 52.87                    | 52.95                       |
| 15               | 3.25      | 30                             | 5                   | 88.41                    | 88.33                       |
| 16               | 2.5       | 40                             | 6.5                 | 50.23                    | 48.72                       |
| 17               | 3.25      | 35                             | 6.5                 | 73.68                    | 73.59                       |

**Table S3** Adequacy of the given model tested for Cr(VI) removal.

| <b>The sequential model with the sum of squares</b> |                       |                      |                               |                                |                |                  |
|-----------------------------------------------------|-----------------------|----------------------|-------------------------------|--------------------------------|----------------|------------------|
| <b>Source</b>                                       | <b>Sum of Squares</b> | <b>df</b>            | <b>Mean Square</b>            | <b>F-value</b>                 | <b>p-value</b> | <b>Remarks</b>   |
| Mean vs Total                                       | 87024.12              | 1                    | 87024.12                      |                                |                |                  |
| Linear vs Mean                                      | 3689.86               | 3                    | 1229.95                       | 90.17                          | < 0.0001       |                  |
| 2FI vs Linear                                       | 81.35                 | 3                    | 27.12                         | 2.83                           | 0.0929         |                  |
| <b>Quadratic vs 2FI</b>                             | <b>81.85</b>          | <b>3</b>             | <b>27.28</b>                  | <b>13.52</b>                   | <b>0.0027</b>  | <b>Suggested</b> |
| Cubic vs Quadratic                                  | 14.10                 | 3                    | 4.70                          | 628.38                         | < 0.0001       | Aliased          |
| Residual                                            | 0.0299                | 4                    | 0.0075                        |                                |                |                  |
| Total                                               | 90891.31              | 17                   | 5346.55                       |                                |                |                  |
| <b>Model Summary fit Statistics</b>                 |                       |                      |                               |                                |                |                  |
| <b>Source</b>                                       | <b>Std. Dev.</b>      | <b>R<sup>2</sup></b> | <b>Adjusted R<sup>2</sup></b> | <b>Predicted R<sup>2</sup></b> | <b>PRESS</b>   |                  |
| Linear                                              | 3.69                  | 0.9541               | 0.9436                        | 0.9092                         | 351.14         |                  |
| 2FI                                                 | 3.10                  | 0.9752               | 0.9603                        | 0.8941                         | 409.72         |                  |
| <b>Quadratic</b>                                    | <b>1.42</b>           | <b>0.9963</b>        | <b>0.9916</b>                 | <b>0.9416</b>                  | <b>225.66</b>  | <b>Suggested</b> |
| Cubic                                               | 0.0865                | 1.0000               | 1.0000                        |                                | *              | Aliased          |
